# Supplementary material
Source: PubMed Central journal article supplement (PMC4712635)

## Supplementary Online Content

Lautner M, Lin H, Shen Y, et al. Disparities in the use of breast-conserving therapy among patients with early-stage breast cancer. *JAMA Surg*. Published online June 17, 2015. doi:10.1001/jamasurg.2015.1102.

**eTable 1.** Association Between Facility Location and Travel Distance to Treatment Facility

**eTable 2.** Association Between Nodal Stage and Socioeconomic Demographics

**eFigure.** Adjusted and Unadjusted Data Showing BCT Utilization Over Time

This supplementary material has been provided by the authors to give readers additional information about their work.

**eTable 1. Association Between Facility Location and Travel Distance to Treatment Facility. Data represents number of patients within each geographic location and their travel distance for treatment.**

|                                       |           | Facility Location |               |               |               |
|---------------------------------------|-----------|-------------------|---------------|---------------|---------------|
|                                       |           | Northeast         | South         | Midwest       | West          |
| Distance from treatment facility (km) | <=6.3     | 48,565(30.7%)     | 48,486(21.3%) | 49,604(26.4%) | 36,366(28.8%) |
|                                       | 6.4-13.2  | 42,629(26.9%)     | 55,616(24.5%) | 44,901(23.9%) | 33,213(26.3%) |
|                                       | 13.3-27.8 | 39,660(25%)       | 56,932(25.1%) | 43,682(23.2%) | 29,230(23.1%) |
|                                       | >27.8     | 27,583(17.4%)     | 66,136(29.1%) | 49,953(26.6%) | 27,578(21.8%) |

**eTable 2. Association Between Nodal Stage and Socioeconomic Demographics**

|                                           | N0            | N1           | N2         | N3         | NX          | p-Value |
|-------------------------------------------|---------------|--------------|------------|------------|-------------|---------|
| Insurance Status                          |               |              |            |            |             |         |
| Medicaid                                  | 24989(71.1%)  | 5943(16.9%)  | 1278(3.6%) | 481(1.4%)  | 2441(6.9%)  | <0.01   |
| Medicare >65years                         | 201603(82.9%) | 18855(7.8%)  | 3374(1.4%) | 1116(0.5%) | 18188(7.5%) |         |
| Medicare <65years                         | 18483(78%)    | 2768(11.7%)  | 532(2.2%)  | 190(0.8%)  | 1726(7.3%)  |         |
| Not Insured                               | 10006(71%)    | 2384(16.9%)  | 461(3.3%)  | 168(1.2%)  | 1078(7.6%)  |         |
| Other government                          | 4209(77.2%)   | 661(12.1%)   | 131(2.4%)  | 47(0.9%)   | 405(7.4%)   |         |
| Private                                   | 308101(78.7%) | 44428(11.4%) | 6925(1.8%) | 2398(0.6%) | 29544(7.5%) |         |
| Median Income, \$                         |               |              |            |            |             | <0.01   |
| <30 000                                   | 62449(76.3%)  | 10080(12.3%) | 1992(2.4%) | 680(0.8%)  | 6697(8.2%)  |         |
| 30,000-34,999                             | 89397(78.5%)  | 12324(10.8%) | 2280(2%)   | 817(0.7%)  | 9026(7.9%)  |         |
| 35,000-45,999                             | 151813(79.6%) | 19784(10.4%) | 3430(1.8%) | 1199(0.6%) | 14583(7.6%) |         |
| >46,000                                   | 246303(80.6%) | 30803(10.1%) | 4723(1.5%) | 1591(0.5%) | 22046(7.2%) |         |
| Population without high school diploma, % |               |              |            |            |             | <0.01   |
| <14.0                                     | 226670(81.3%) | 26896(9.6%)  | 4108(1.5%) | 1383(0.5%) | 19877(7.1%) |         |
| 14.0-19.9                                 | 131723(79.9%) | 16649(10.1%) | 2865(1.7%) | 982(0.6%)  | 12541(7.6%) |         |
| 20.0-28.9                                 | 115277(78.3%) | 16318(11.1%) | 2969(2%)   | 1022(0.7%) | 11680(7.9%) |         |
| >29.0                                     | 76241(75.5%)  | 13125(13%)   | 2481(2.5%) | 899(0.9%)  | 8252(8.2%)  |         |
| Distance from treatment facility, km      |               |              |            |            |             | <0.01   |
| <=6.3                                     | 135093(79.7%) | 17853(10.5%) | 3075(1.8%) | 1033(0.6%) | 12450(7.3%) |         |
| 6.4-13.2                                  | 144966(79.2%) | 18763(10.3%) | 3271(1.8%) | 1081(0.6%) | 14940(8.2%) |         |
| 13.3-27.8                                 | 140182(79.5%) | 18628(10.6%) | 3105(1.8%) | 1051(0.6%) | 13393(7.6%) |         |
| >27.8                                     | 136115(79.5%) | 18646(10.9%) | 3135(1.8%) | 1179(0.7%) | 12175(7.1%) |         |

**eFigure. Adjusted and Unadjusted Data Showing BCT Utilization Over Time  
Function of (A) facility type**

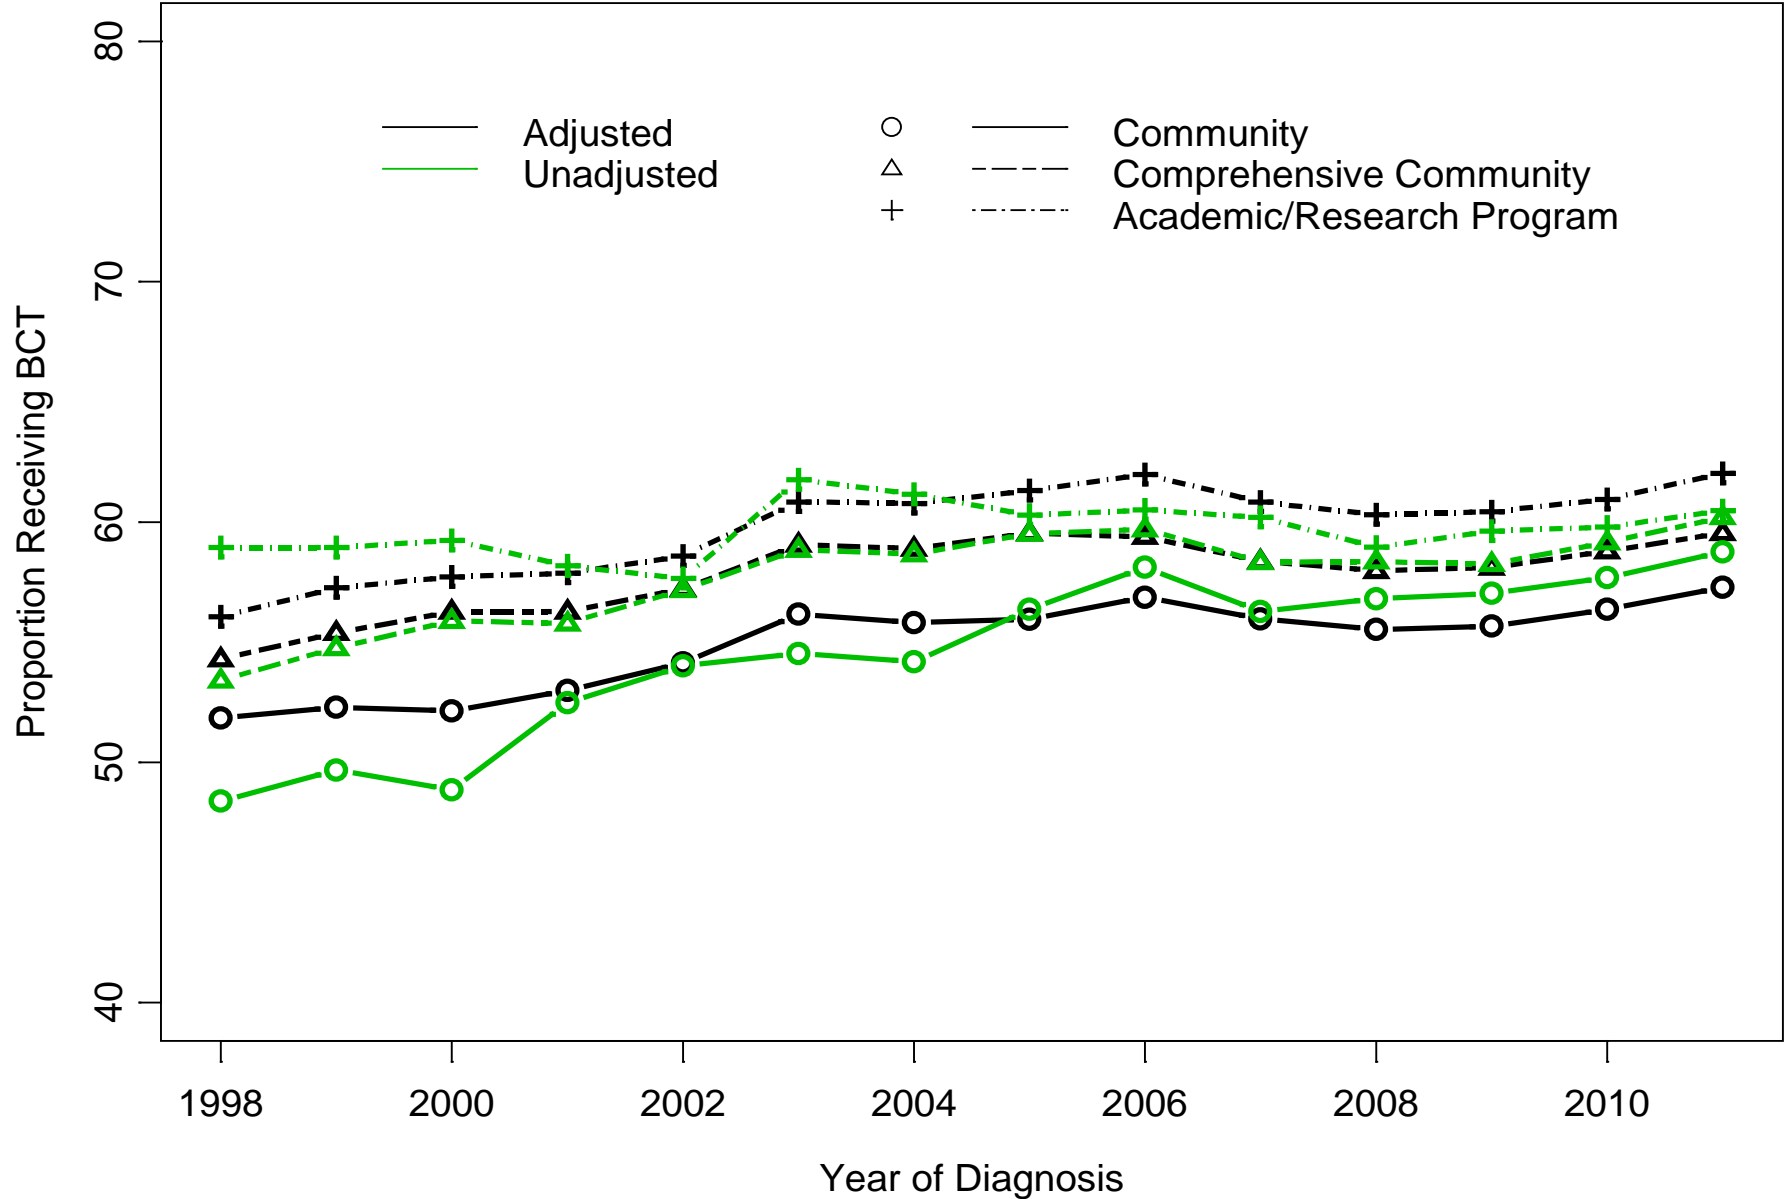

**Figure 2A**

**eFigure. Adjusted and Unadjusted Data Showing BCT Utilization Over Time  
Function of (B) facility location**

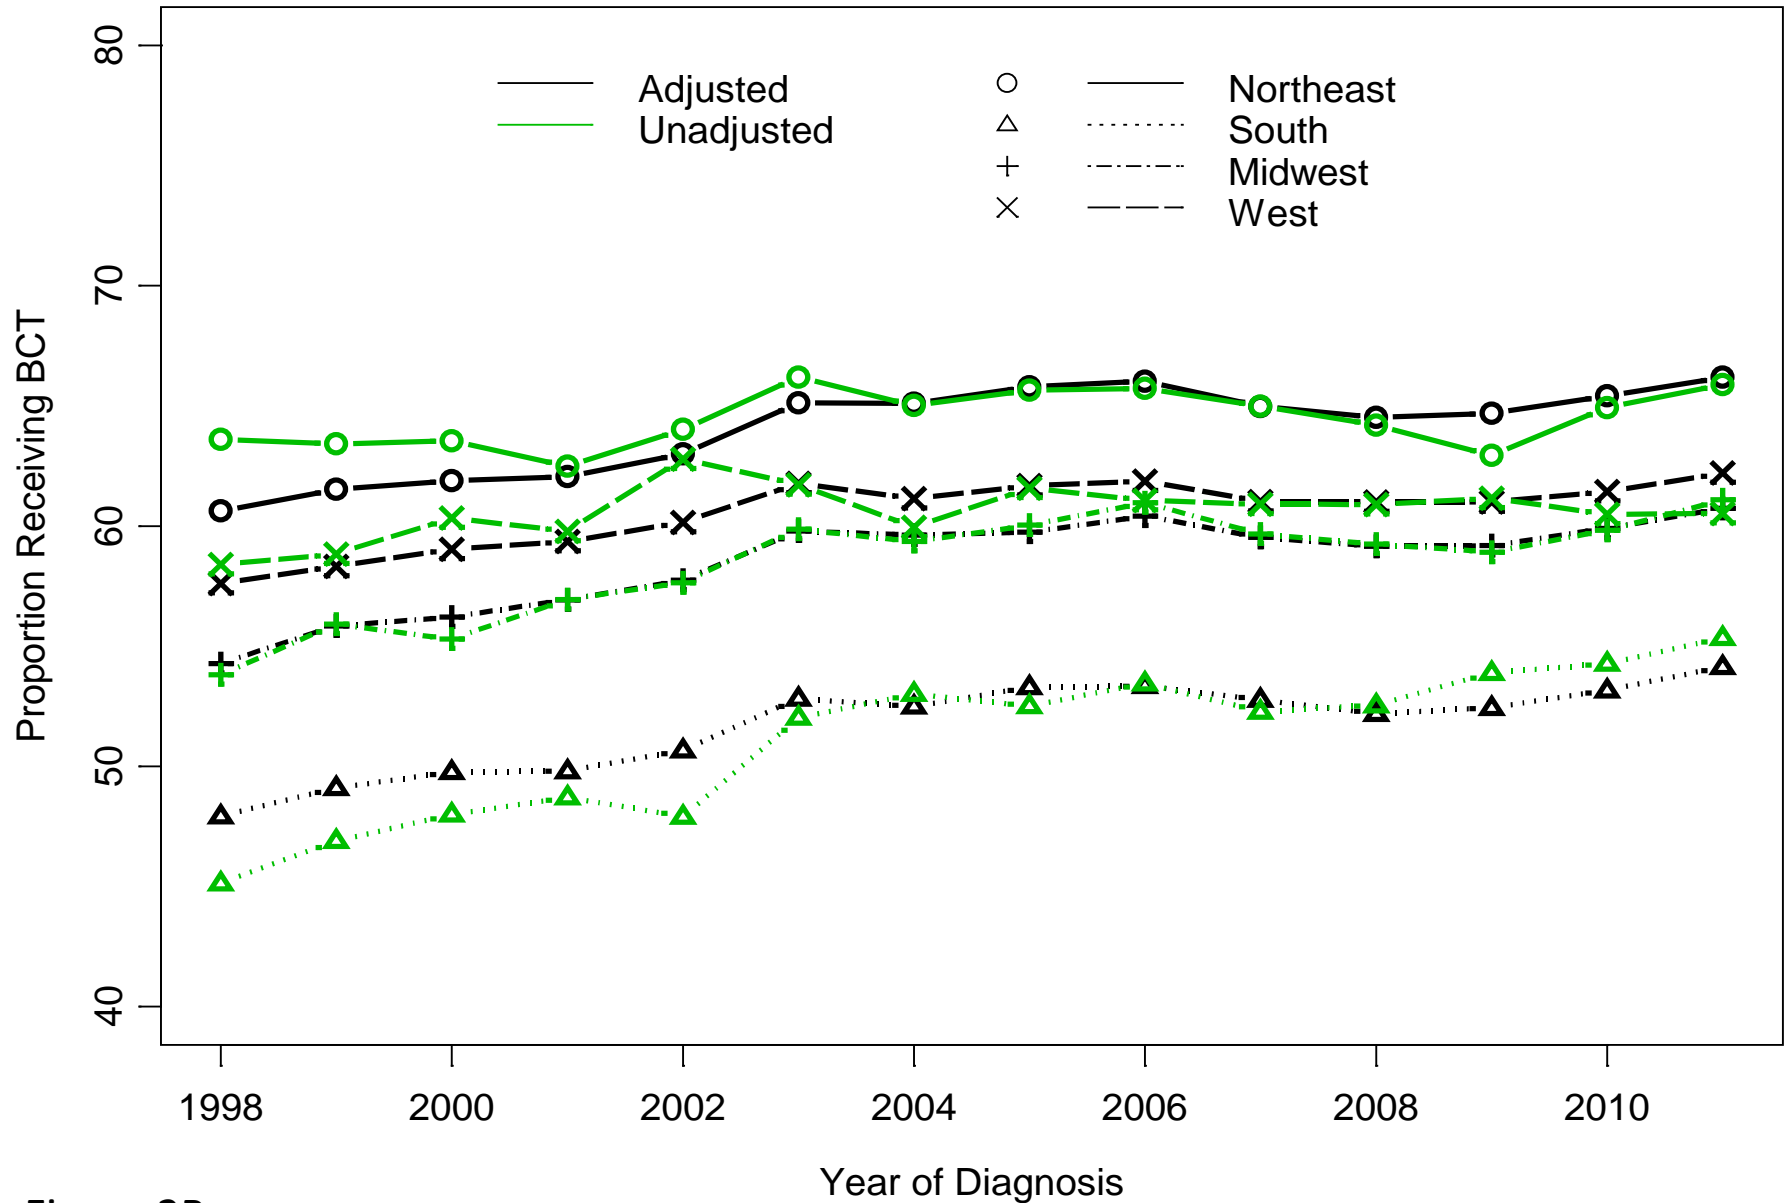

**Figure 2B**

eFigure. Adjusted and Unadjusted Data Showing BCT Utilization Over Time  
Function of (C) age

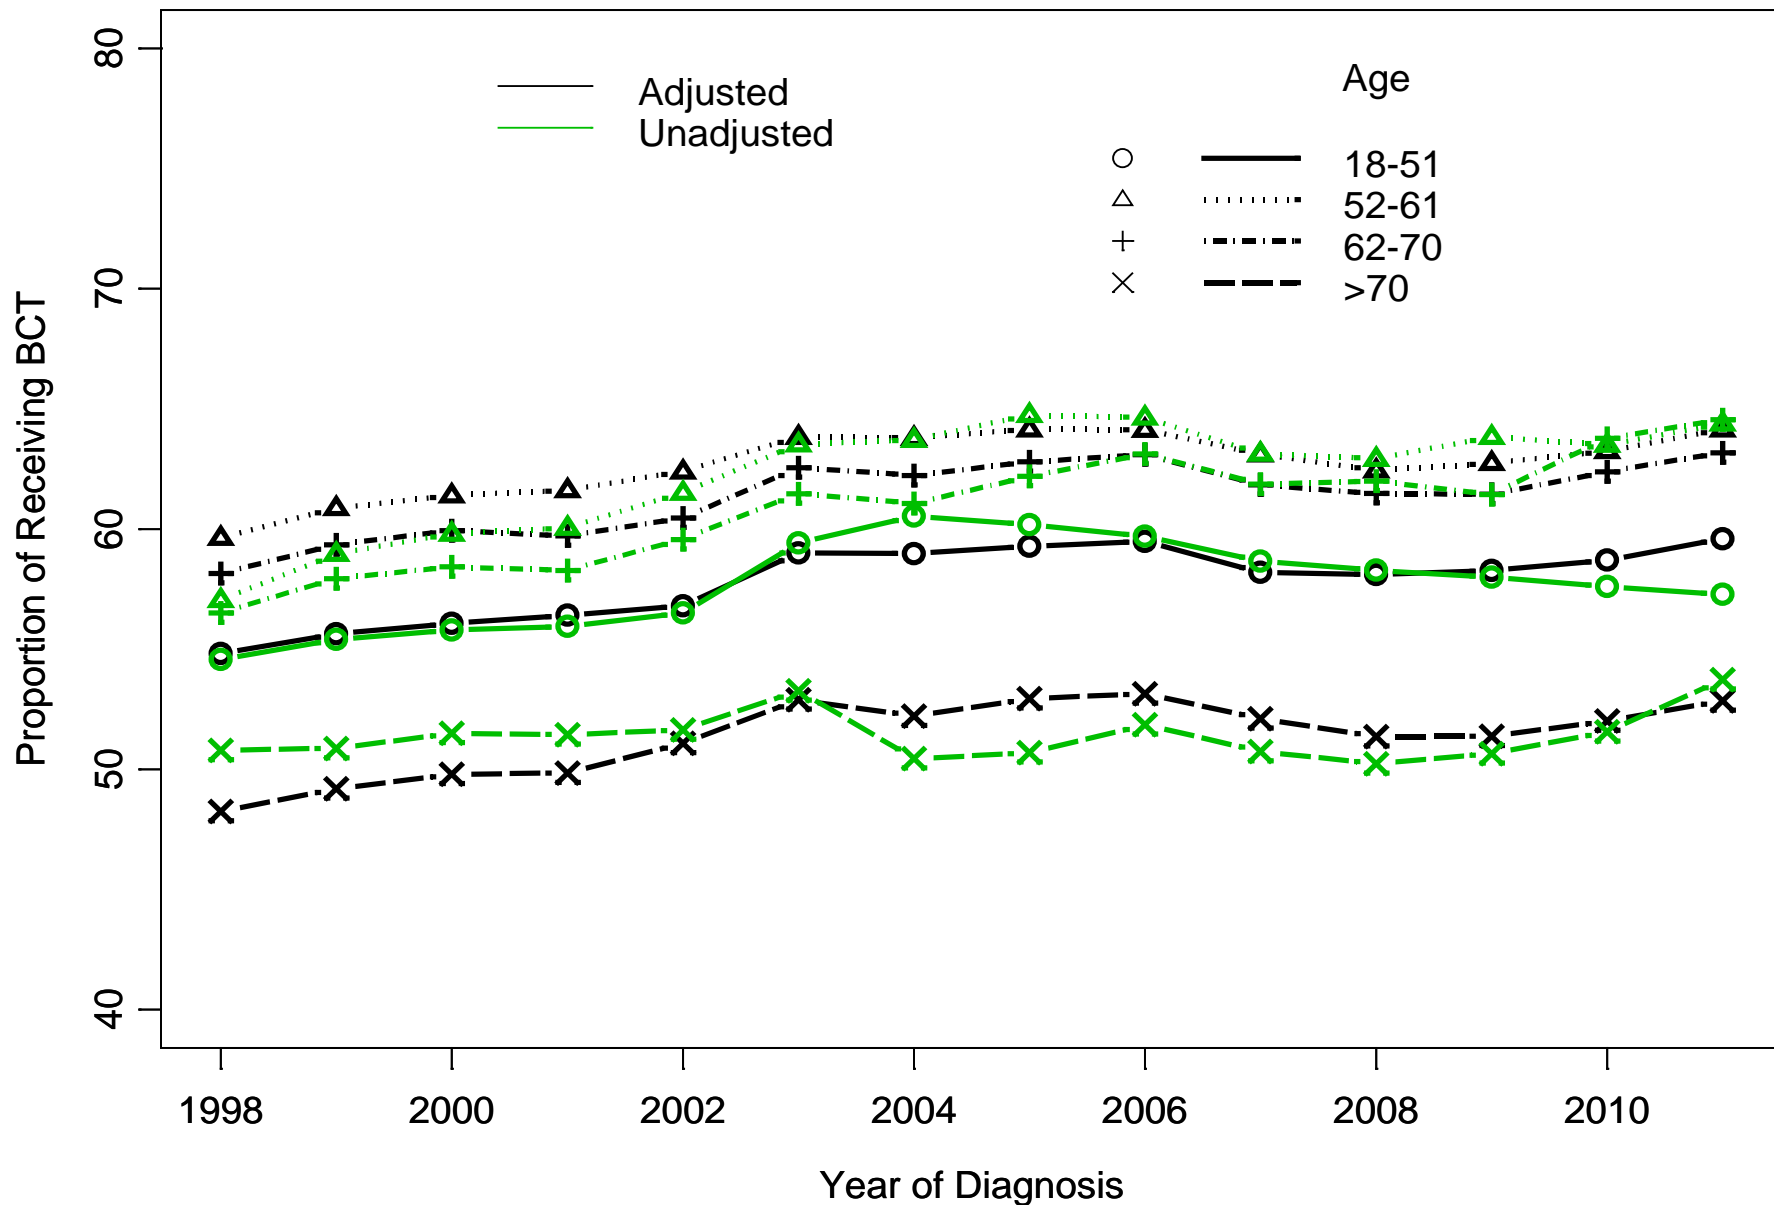

Figure 2C

**eFigure. Adjusted and Unadjusted Data Showing BCT Utilization Over Time  
Function of (D) insurance status**

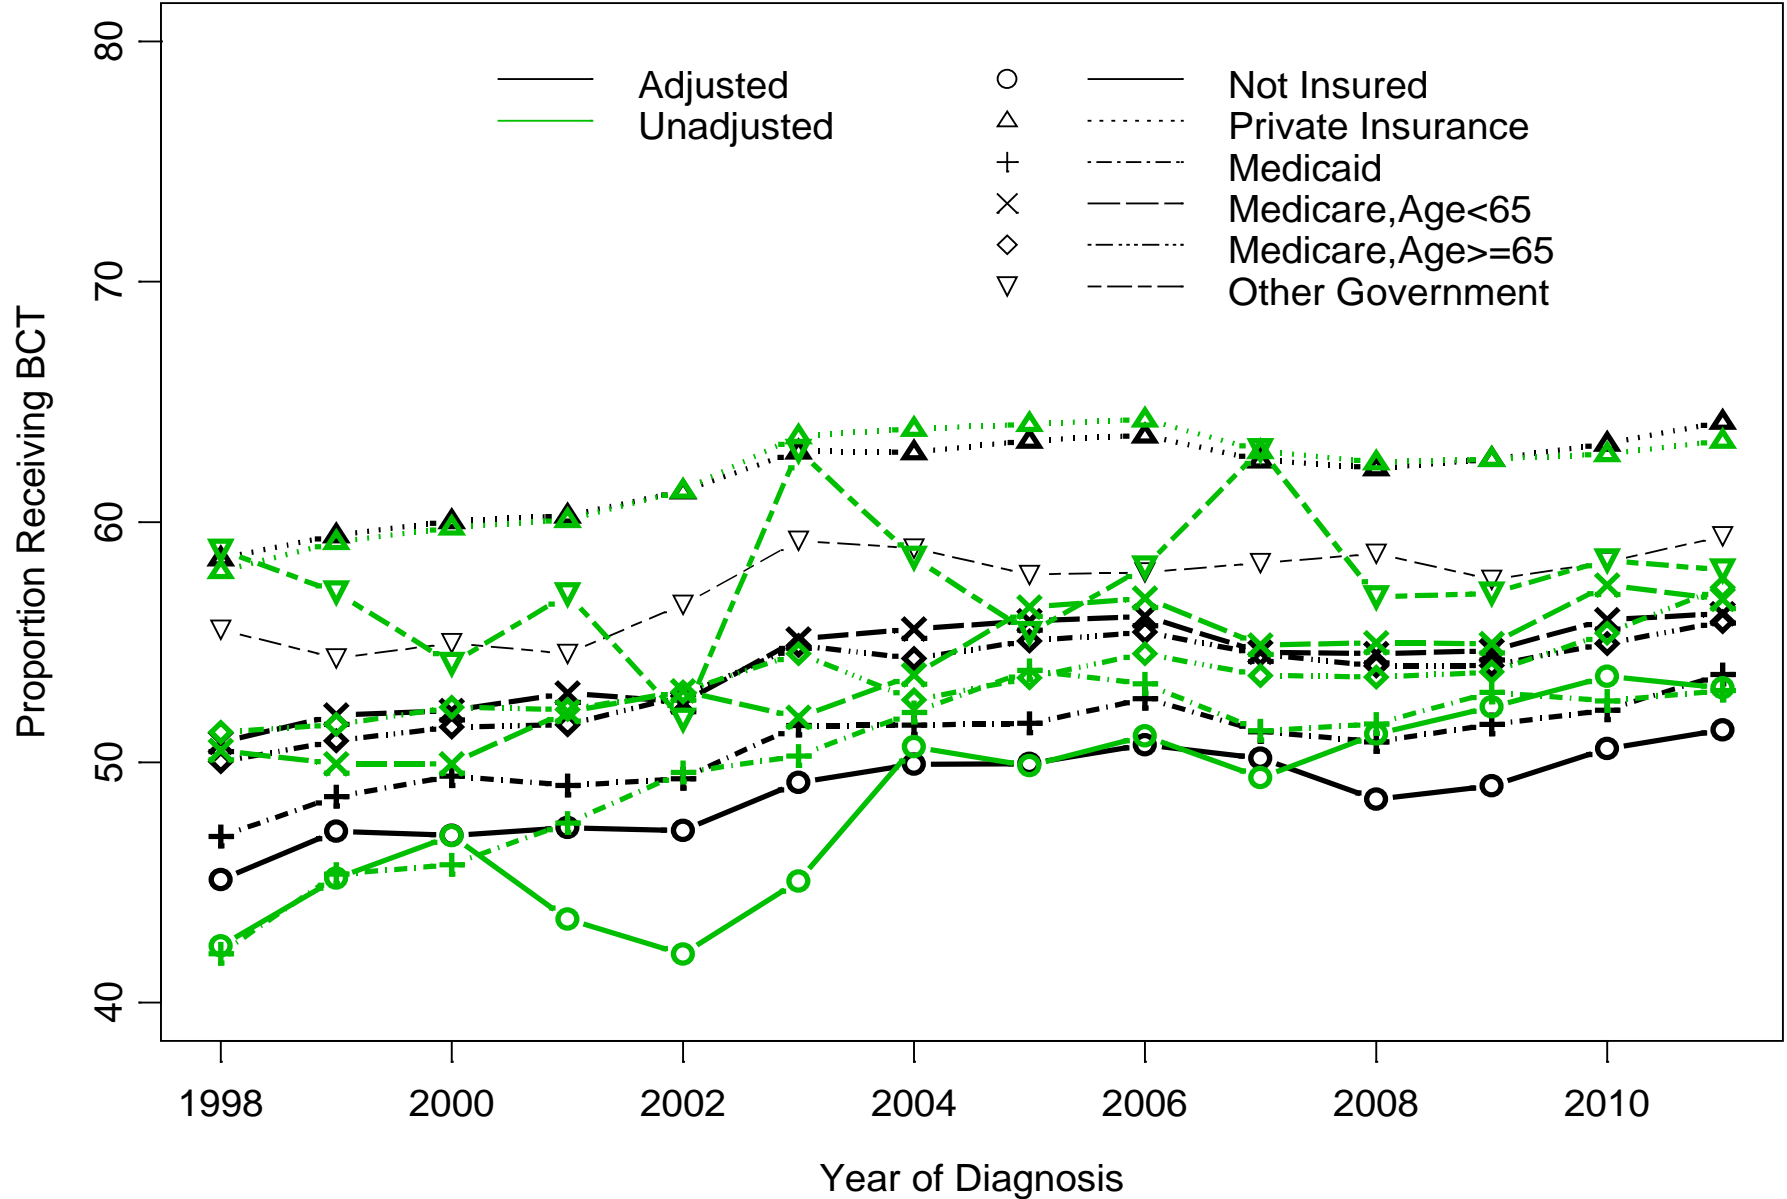

**Figure 2D**

**eFigure. Adjusted and Unadjusted Data Showing BCT Utilization Over Time  
Function of (E) residence distance from treatment facility**

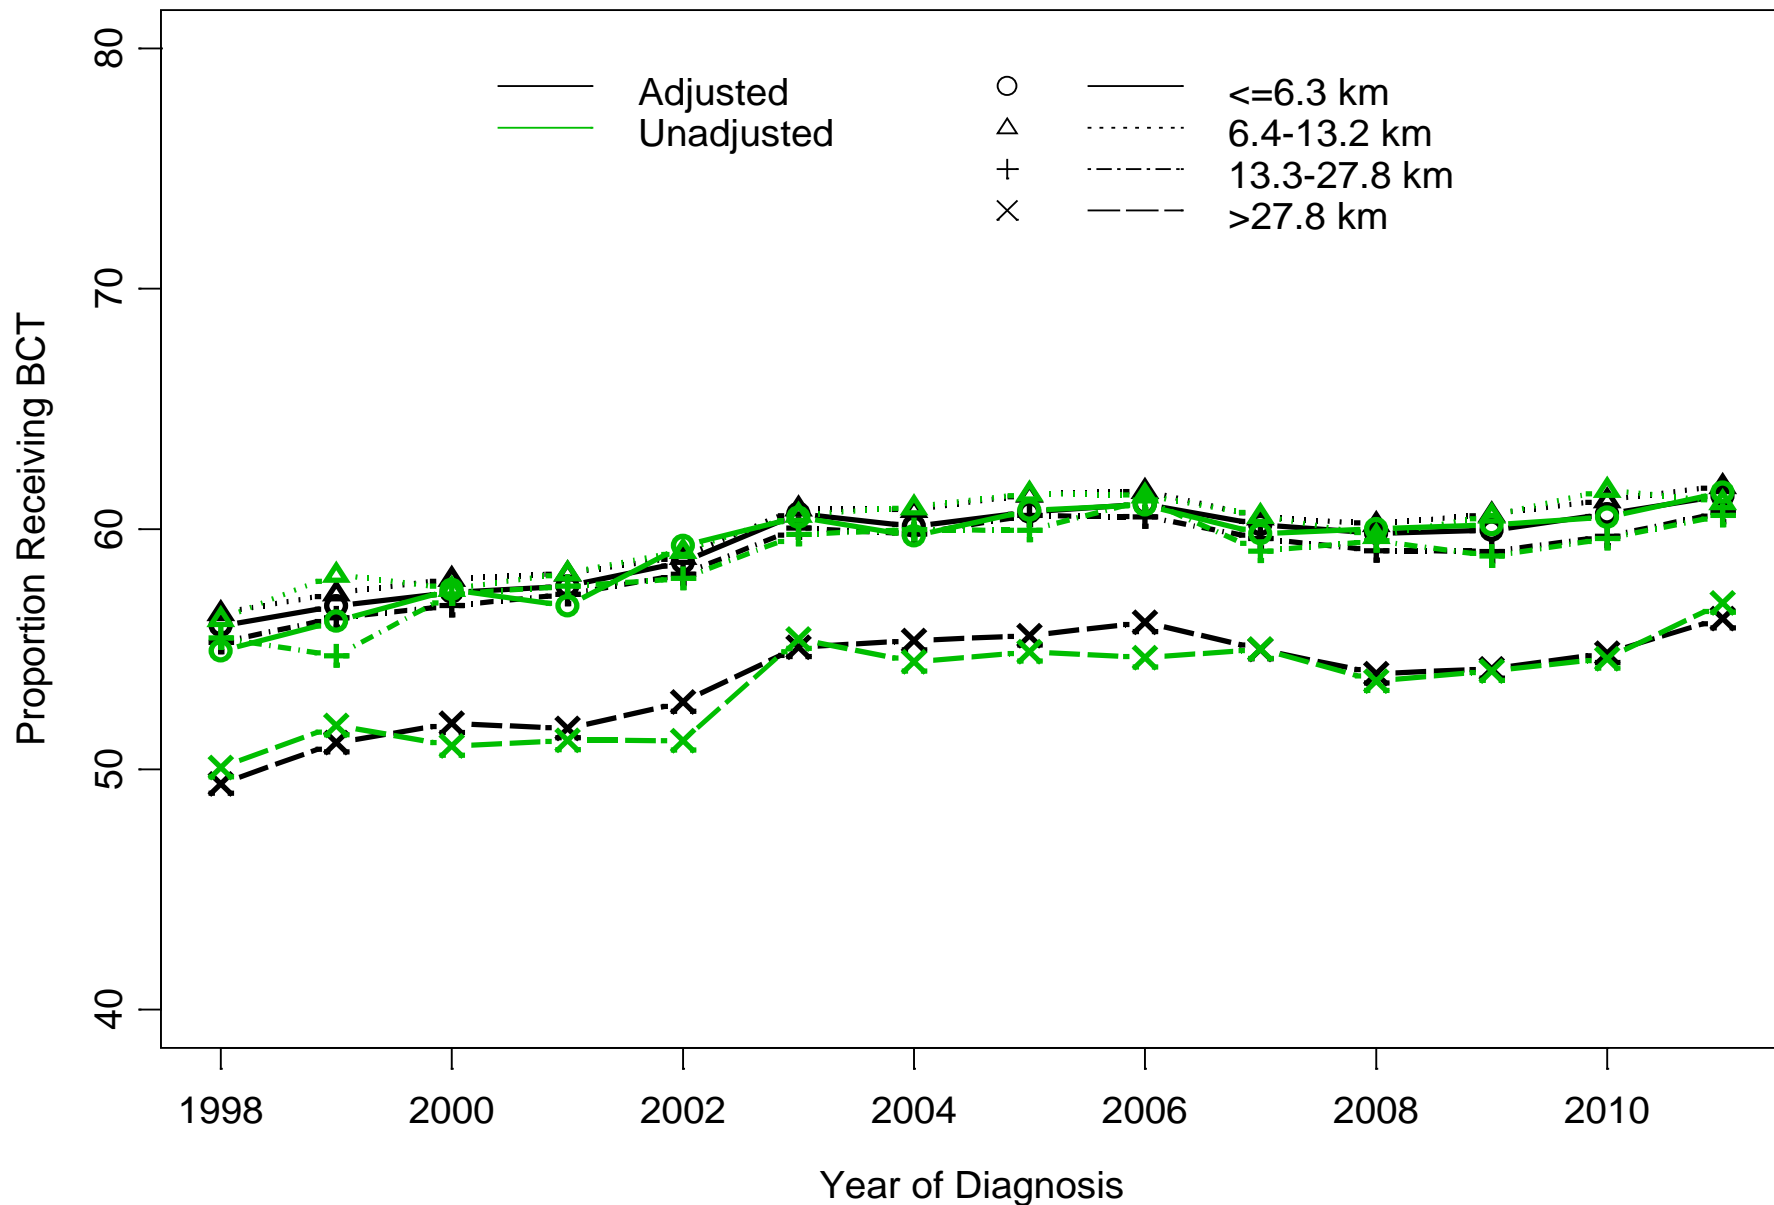



eFigure. Adjusted and Unadjusted Data Showing BCT Utilization Over Time  
 Function of (F) annual median income

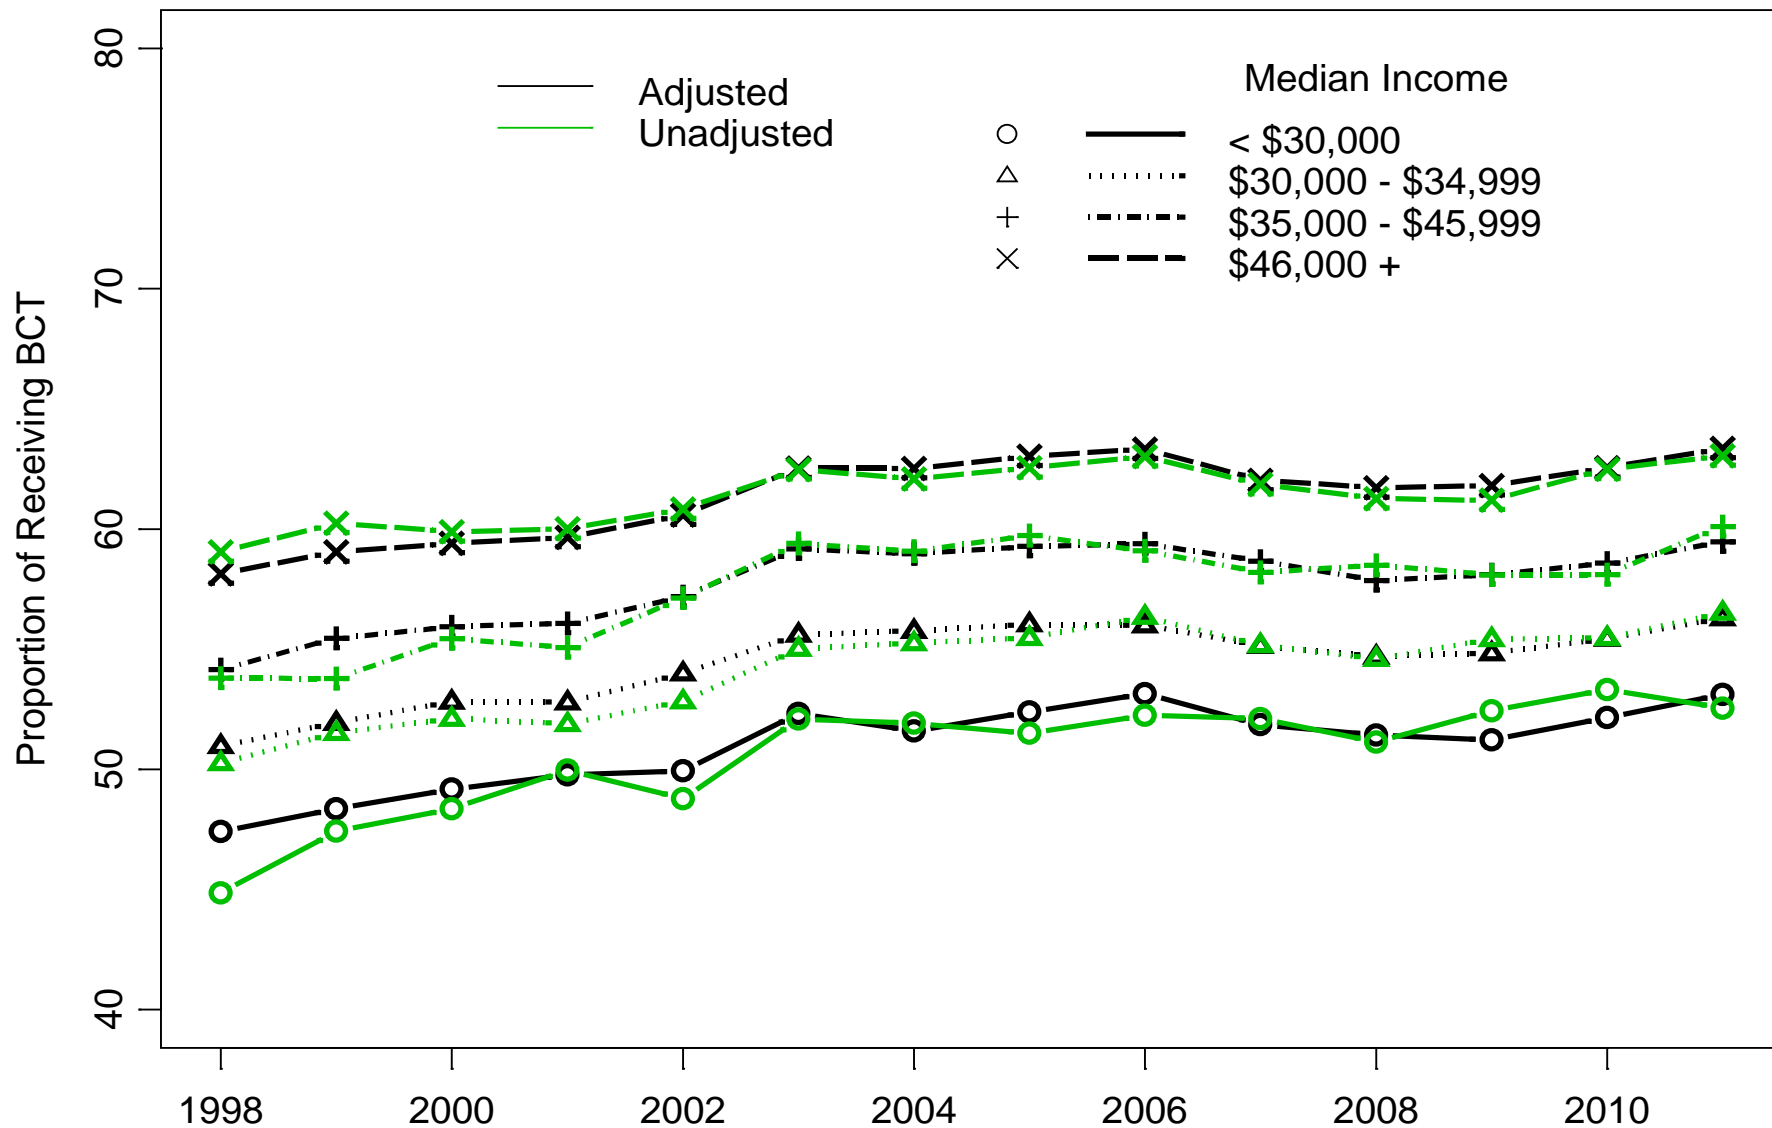

Supplement: NIHMS737511-supplement-Supplementary_data.pdf [file NIHMS737511-supplement-Supplementary_data.pdf]
